# Supplementary material
Source: HighWire-hosted journal article supplement (https://nutrition.bmj.com/content/bmjnph-2019-000034)
Supplement: inline-supplementary-material-4 [file inline-supplementary-material-4.pdf]

**S2 Table.** Multivariable-Adjusted\* relationships of weight change and changes in nut intake (0.5 serving/day) and using 0.5 serving of nuts as substitution for other dietary components during a 4-y interval on pooled data of Nurses' Health Study I, Nurses' Health Study II, and the Health Professionals Follow-Up Study.

|                | Total nuts             | Tree nuts              | Other tree nuts        | Walnuts                | Peanuts                | Peanut butter          |
|----------------|------------------------|------------------------|------------------------|------------------------|------------------------|------------------------|
| Main effect    | -0.16<br>(-0.18,-0.13) | -0.24<br>(-0.28,-0.21) | -0.34<br>(-0.39,-0.29) | -0.30<br>(-0.38,-0.22) | -0.11<br>(-0.15,-0.07) | -0.14<br>(-0.17,-0.12) |
| Refined Grain  | -1.25<br>(-1.34,-1.16) | -1.34<br>(-1.43,-1.25) | -1.55<br>(-1.71,-1.39) | -1.52<br>(-1.69,-1.35) | -1.20<br>(-1.30,-1.11) | -1.24<br>(-1.34,-1.15) |
| Processed meat | -0.31<br>(-0.33,-0.29) | -0.40<br>(-0.43,-0.37) | -0.66<br>(-0.72,-0.60) | -0.62<br>(-0.71,-0.54) | -0.26<br>(-0.30,-0.22) | -0.30<br>(-0.33,-0.27) |
| Red Meat       | -3.73<br>(-3.93,-3.54) | -3.82<br>(-4.01,-3.62) | -4.49<br>(-4.85,-4.14) | -4.46<br>(-4.82,-4.11) | -3.68<br>(-3.87,-3.48) | -3.72<br>(-3.91,-3.52) |
| Dessert        | -0.64<br>(-0.67,-0.60) | -0.73<br>(-0.77,-0.68) | -0.51<br>(-0.58,-0.44) | -0.47<br>(-0.56,-0.37) | -0.59<br>(-0.64,-0.54) | -0.62<br>(-0.66,-0.58) |
| French fries   | -0.05<br>(-0.08,-0.03) | -0.14<br>(-0.17,-0.11) | -0.24<br>(-0.29,-0.19) | -0.20<br>(-0.28,-0.12) | 0.00<br>(-0.04,0.04)   | -0.04<br>(-0.06,-0.01) |
| Chips          | -0.88<br>(-0.92,-0.84) | -0.96<br>(-1.01,-0.92) | -0.51<br>(-0.59,-0.43) | -0.47<br>(-0.57,-0.37) | -0.83<br>(-0.88,-0.78) | -0.86<br>(-0.91,-0.82) |

\*Model was further adjusted for AHEI score without nuts.

Model was adjusted for age, menopausal status (pre- or postmenopausal) and hormone therapy use (never, past, or current) in women; baseline BMI of every 4 year; hours of sleeping at baseline; changes in lifestyle factors: smoking status (never, former, current: 1 to 14, 15 to 24, or  $\geq 25$  cigarettes/day), physical activity (Met/h/wk), hours of sitting (hr/wk); changes in dietary factors: alcohol, potato chips, potato, dessert, French fries and refined grain products. The P-values are less than 0.001 for all nuts. Data of walnuts and other tree nuts were firstly available at 1998 of NHS, 1998 of HPFS and 1999 of NHSII.  $P < 0.01$  for all.

Tree nut consumption was sum of other tree nut and walnut (if available). Total nut consumption was sum of peanut, tree nut and walnut (if available)
