# Supplementary material
Source: HighWire-hosted journal article supplement (https://nutrition.bmj.com/content/bmjnph-2019-000034)
Supplement: inline-supplementary-material-6 [file inline-supplementary-material-6.pdf]

**S4 Table.** Multivariable-Adjusted relationships of weight change and changes in nut intake within a 4-y period among 144,885 US men and women

|                 | Multivariable-<br>adjusted*     | P-value | Multivariable-<br>adjusted*     | P-value |
|-----------------|---------------------------------|---------|---------------------------------|---------|
| Total nuts      | -0.31 (-0.36,-0.27)             | <.0001  | -0.35(-0.42,-0.28)              | <.0001  |
| Tree nuts       | -0.57(-0.64,-0.51) <sup>α</sup> | <.0001  | -0.47(-0.56,-0.38)              | <.0001  |
| Walnuts         | -0.68(-0.92,-0.44)              | <.0001  | -0.49(-0.65,-0.33) <sup>β</sup> | <.0001  |
| Other tree nuts | -0.81(-0.96,-0.65)              | <.0001  | -0.64(-0.74,-0.54) <sup>β</sup> | <.0001  |
| Peanuts         | -0.18(-0.26,-0.10) <sup>α</sup> | <.0001  | -0.28(-0.39,-0.17) <sup>β</sup> | <.0001  |

\*Model was further adjusted for AHEI score without nuts.

<sup>α</sup>Tree nuts and peanuts are mutually adjusted in addition to multivariable-adjusted model adjusted for age, menopausal status (pre- or postmenopausal) and hormone therapy use (never, past, or current) in women; baseline BMI of every 4 year; hours of sleeping at baseline; changes in lifestyle factors: smoking status (never, former, current: 1 to 14, 15 to 24, or ≥25 cigarettes/day), physical activity (Met/h/wk), hours of sitting; changes in dietary factors: fruits, vegetables, alcohol, snacks, dessert, French fries, potato, red or processed meat, whole grain, refined grain and sweet sugar beverages.

<sup>β</sup>walnuts, other tree nuts and peanuts are mutually adjusted in addition to multivariable-adjusted
